# Supplementary material for: A novel vaccine candidate based on chimeric virus-like particle displaying multiple conserved epitope peptides induced neutralizing antibodies against EBV infection
Source: PubMed Central journal article supplement (PMC7255000; doi:10.7150/thno.42494), 2020-04-27
Supplement: thnov10p5704s1.pdf [file thnov10p5704s1.pdf]

## **Supplementary Materials**

### **Materials and Methods**

The endotoxin level of each protein sample was measured by the toxinsensor™ chromogenic limulus amoebocyte lysate (LAL) endotoxin assay kit according to the manufacturer's instructions (GenScript, New Jersey, USA).

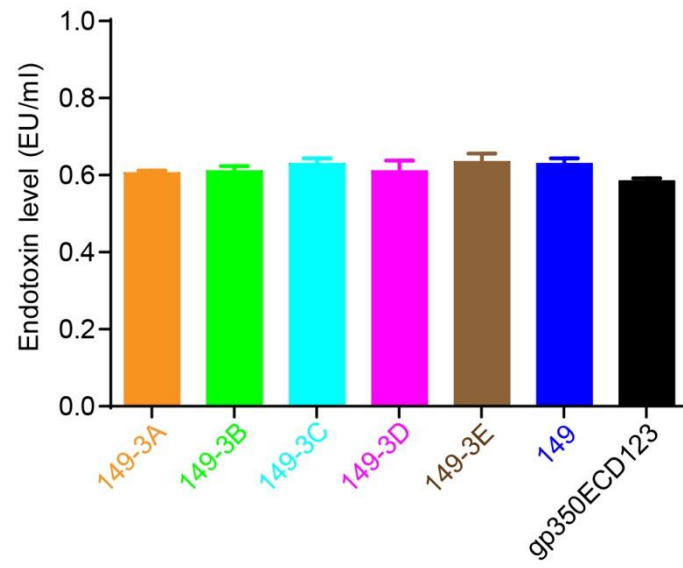

**Figure S1** Detection of endotoxin level of different proteins used in immunization assay.

**Table S1** Calculation of ID50 values for the serum raised by different proteins

| Proteins          | 149-3A | 149-3B | 149-3C          | 149-3D | 149-3E | 149 | gp350ECD123 |
|-------------------|--------|--------|-----------------|--------|--------|-----|-------------|
| ID50 <sup>1</sup> | 13.43  | 18.93  | ND <sup>2</sup> | ND     | ND     | ND  | 9.91        |

<sup>1</sup> Inhibition doses calculated based on data from figure 6B

<sup>2</sup> ND indicates the ID50 value can not be calculated.
